# Supplementary material for: Effects of grain boundary structure and shape of the solid–liquid interface on the growth direction of the grain boundaries in multicrystalline silicon
Source: Royal Society of Chemistry journal article supplement (doi:10.1039/d1ce01573g), 2022-01-01
Supplement: d1ce01573g1.pdf [file d1ce01573g1.pdf]

## Supplemental

### Effects of grain boundary structure and shape of the solid-liquid interface on the growth direction of the grain boundaries in multicrystalline silicon

Yusuke Fukuda<sup>\*a</sup>, Kentaro Kutsukake<sup>b</sup>, Takuto Kojima<sup>c</sup> and Noritaka Usami<sup>a</sup>

a. 1 Grad. Eng. Nagoya Univ., Nagoya, Aichi, Japan

E-mail: fukuda.yusuke@d.mbox.nagoya-u.ac.jp

b. AIP, RIKEN, Nihonbashi, Tokyo, Japan

c. Grad. Info. Nagoya Univ., Nagoya, Aichi, Japan

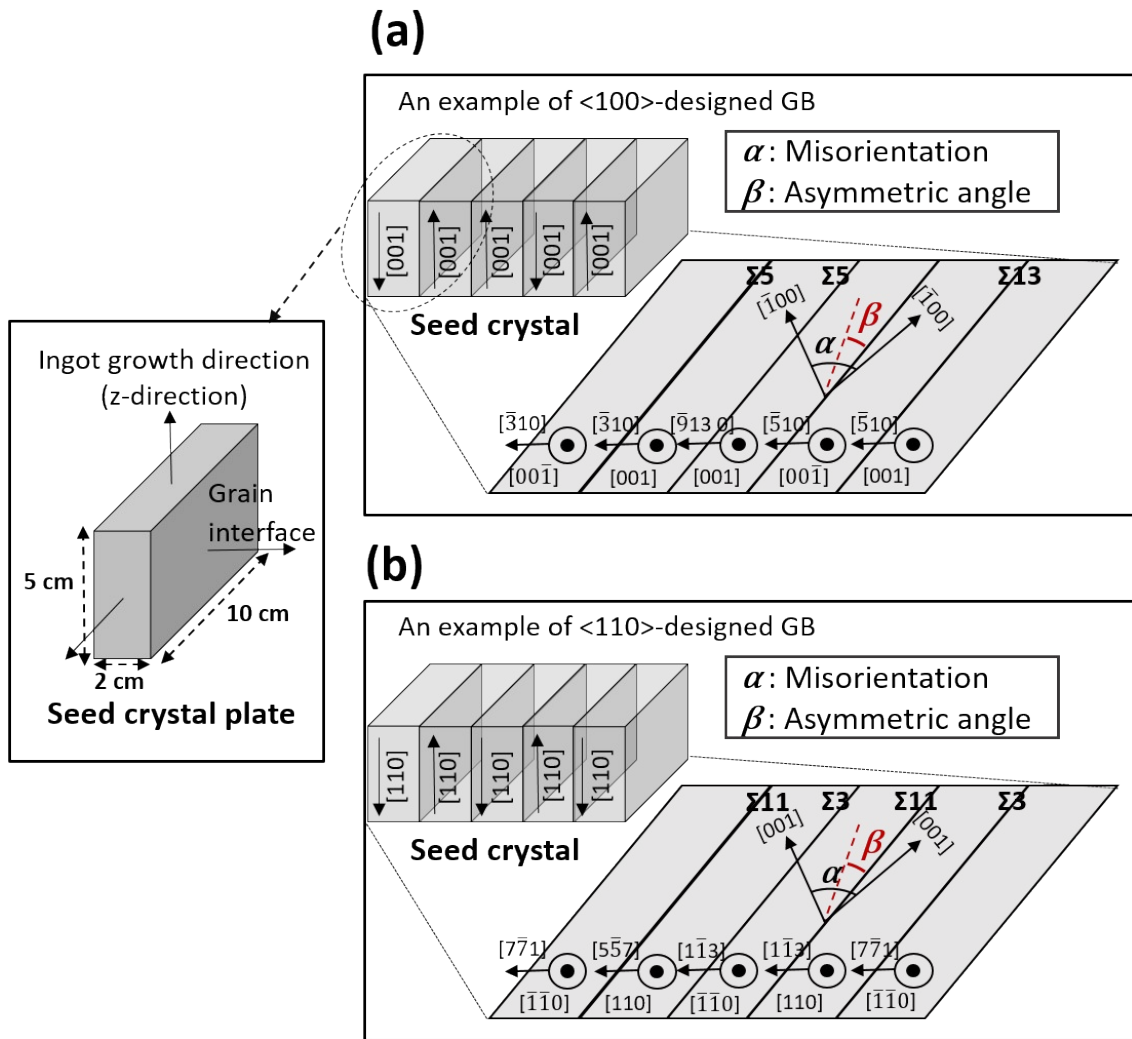

Figure S1 (a) An example of the design of the seed crystal to fabricate <100>-designed GBs. (b) An example of the design of the seed crystal to fabricate <110>-designed GBs. 4 GBs can be fabricated by combining 5 seed crystal plates.

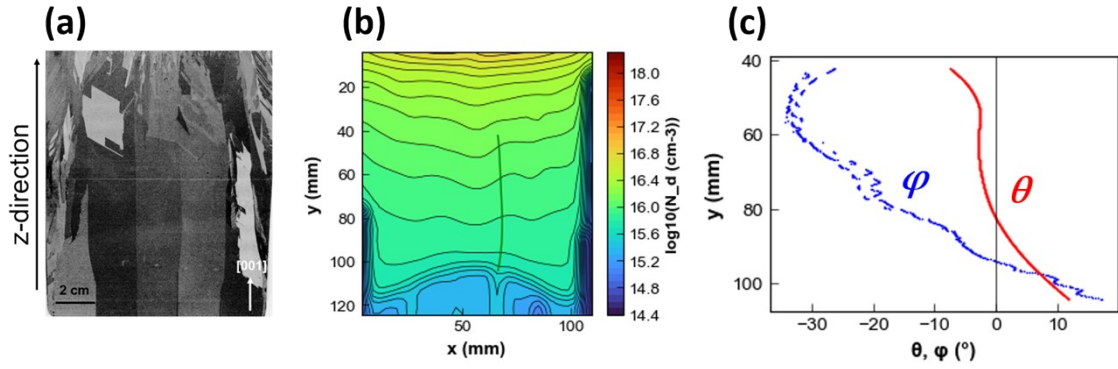

Figure S2 (a) An optical image and (b) carrier concentration of an example of the ingot cross-section with  $\langle 100 \rangle$ -designed GBs. This distribution shows solid-liquid interface shape changes from convex to concave seen from solid with crystal growth proceeds. (c) The results of analyzing the GB plane inclination angle with respect to z-direction ( $\theta$ ) and the angle between the direction perpendicular to the solid-liquid interface and the z-direction ( $\phi$ ) for  $\langle 100 \rangle$  (9 13 0)/ $(\bar{5}10)$  GB (green line in Fig. S2(b) )

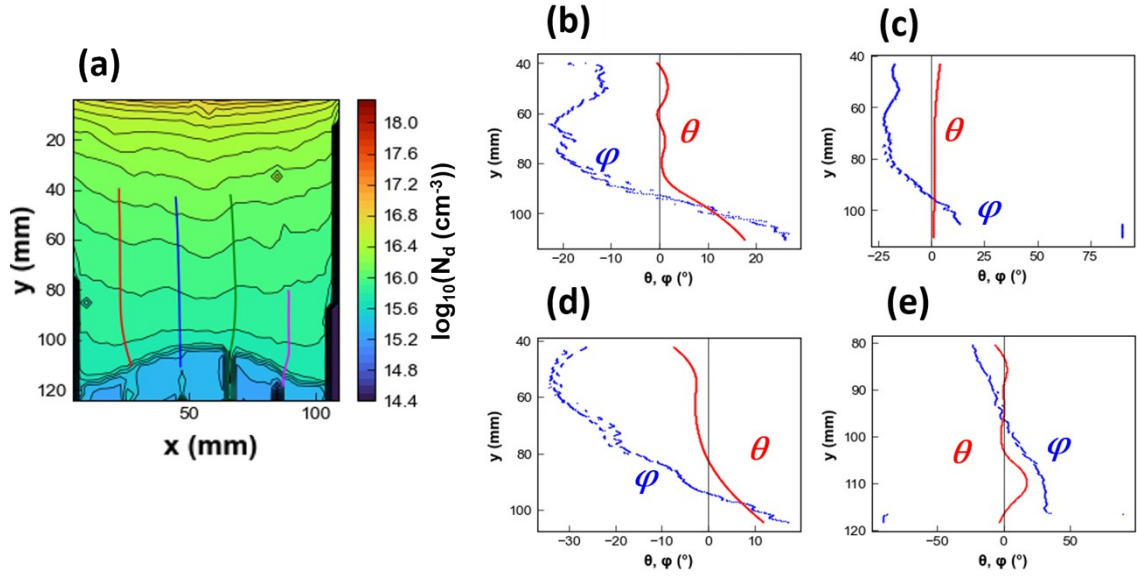

Figures S3 (a) Carrier concentration and the position of four <100>-designed GBs. Quantitative results of  $\theta$  and  $\varphi$  at GBs from left to right are shown in Fig. S3 (b)~(e), respectively. It is seen that the behavior of the GBs is well explained by our theory in the vicinity of the seed crystal. On the other hand, at the upper position ( $y = 40 \sim 80$  mm), some GBs do not follow our theory as shown in Fig. S3 (b) and (c). The interaction of dislocations with GBs might be related to the phenomena. Notably, only 6 among 17 GBs showed such an unpredictable behavior, and our simple theory explains the majority of GBs.

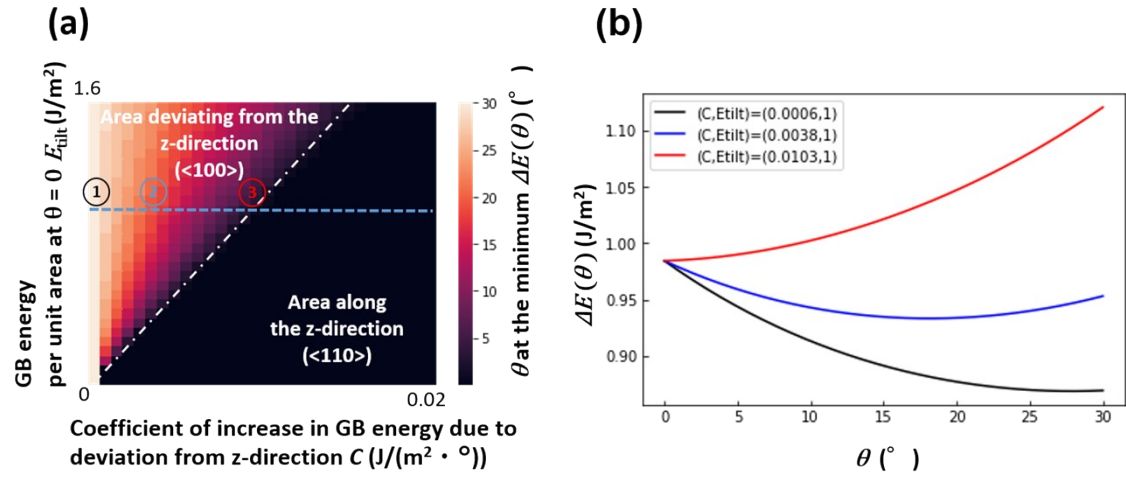

Figure S4 (a) GB growth direction  $\theta$  to minimize  $\Delta E(\theta)$  when  $\varphi = 30^\circ$  estimated by assuming a linear model. The GB energy per unit area ( $E_{\text{tilt}}$ ) at  $\theta = 0$ , and the coefficient of increase of the GB energy per unit area ( $C$ ) were treated as parameters ( $E_{\text{tilt}}$ : 0 ~ 1.6,  $C$ : 0 ~ 0.02,) for the calculation. (b) The relationship between  $\Delta E(\theta)$  and  $\theta$  at  $E_{\text{tilt}}$  and  $C$  which corresponds to 1, 2, and 3 in Figure S4(a). It is seen that the  $\theta$  to minimize  $\Delta E(\theta)$  varies depending on the combination of  $E_{\text{tilt}}$  and  $C$

Table1 Relationship between GB structure, GB energy and GB growth direction.

These results suggest that the GB energies of <110>-designed GBs such as  $\Sigma 3$  and  $\Sigma 9$  GBs smaller than those of <100>-designed GBs such as  $\Sigma 5$ ,  $\Sigma 13$ , and  $\Sigma 25$  GBs.

| Type of GBs       | $E_{tilt}$                                                                                                      | Experimental behavior                                                                                                            |
|-------------------|-----------------------------------------------------------------------------------------------------------------|----------------------------------------------------------------------------------------------------------------------------------|
| {111} $\Sigma 3$  | 0.051J/m <sup>2</sup> by DFT [Ref.S1]                                                                           | 1. $\theta = 0^\circ, \phi = 7.5^\circ$ (initial interface)                                                                      |
| {221} $\Sigma 9$  | 0.32 or 0.29 J/m <sup>2</sup> by DFT [Ref.S2-5]                                                                 | 1. $\theta = 0^\circ, \phi = 8^\circ$ (initial interface)                                                                        |
| {221} $\Sigma 9$  | 0.45 J/m <sup>2</sup> by molecular-dynamics simulation techniques using the Stillinger-Weber potential [Ref.S9] | 1. $\theta = 0^\circ, \phi = 8^\circ$ (initial interface)                                                                        |
| {310} $\Sigma 5$  | 0.42 J/m <sup>2</sup> by DFT [Ref.S6-8]                                                                         | 1. $\theta = 17.6^\circ, \phi = 28^\circ$ (initial interface)<br>2. $\theta = 11.5^\circ, \phi = 28.3^\circ$ (initial interface) |
| {510} $\Sigma 13$ | 0.89 J/m <sup>2</sup> by molecular-dynamics simulation techniques using the Stillinger-Weber potential[Ref. S9] | $\theta = 17.5^\circ, \phi = 28.9^\circ$ (initial interface)                                                                     |
| {710} $\Sigma 25$ | 0.84 J/m <sup>2</sup> by molecular-dynamics simulation techniques using the Stillinger-Weber potential[Ref. S9] | $\theta = 1.5^\circ, \phi = 6.8^\circ$ (initial interface)                                                                       |

Ref. 1\* : L. F. Mattheiss and J. R. Patel, Phys. Rev. B,1981, **23**, 5384

Ref. 2\* : M. Kohyama, R. Yamamoto and M. Doyama, *Physica Status Solidi B-basic Solid State Physics*, 1986, **137**, 11.

Ref. 3\* : M. Kohyama, R. Yamamoto and M. Doyama, *Physica Status Solidi B-basic Solid State Physics*, 1986, **138**, 387.

Ref. 4\* : R. E. Thomson and D. J. Chadi, Phys. Rev. B,1984, **29**, 889

Ref. 5\* :D. P. DiVincenzo, O. L. Alerhand, M. Schluter and J. W. Wilkins, Phys. Rev. Lett.,1986, **56**, 1925

Ref. 6\* : M. Kohyama, R. Yamamoto, Y. Ebata, M. Kinoshita, J. Phys., 1988, **21**, 3205

Ref. 7\* : J. Hornstra, Physica, 1960, **26**, 198

Ref. 8\* : J. J. Bacmann, A. M. Papon, M. Petit and G. Silvestre, Phil. Mag. A, 1985, **51**, 697

Ref. 9\* : F. H. Stillinger and T. A. Weber, Phys. Rev. B **31**, 1985, 5262.
